# Supplementary material
Source: PubMed Central journal article supplement (PMC2947173)
Supplement: tpc.109.071720_1.pdf [file tpc.109.071720_1.pdf]

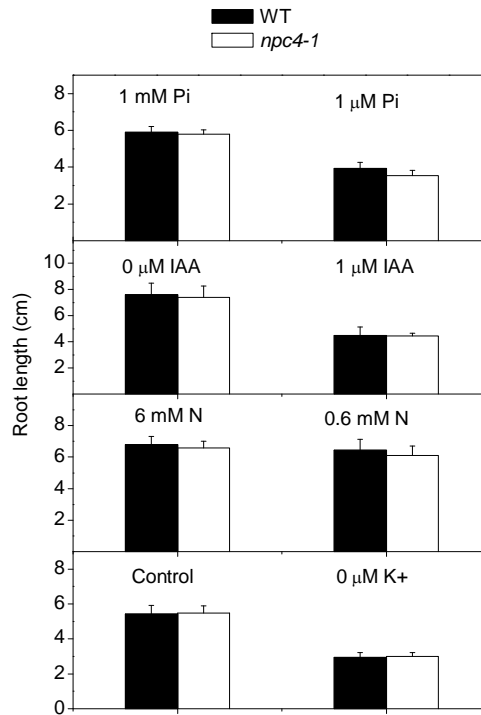

**Supplemental Figure 1. Root length of *npc4-1* and WT seedlings grown in medium deficient in phosphate, potassium or nitrogen, or containing IAA.**

For root growth assays, 5-day old seedlings were transferred to treatment media and grown under cool white fluorescent light of  $100 \mu\text{mol m}^{-2}\text{s}^{-1}$  under 12-h light/ 12-h dark and 23°C/22°C cycles. Phosphate media were prepared as described by Lopez-Bucio et al. (2002). Measurements were taken after 10 days (*uppermost panel*). Values are means  $\pm$  SD (n=15). For WT and *npc4-1* in response to IAA, five-day old seedlings were transferred to  $\frac{1}{2}$  MS media with or without IAA and the primary root growth was recorded after 7 days (*second panel*). Values are means  $\pm$  SD (n=15). Nitrogen media were prepared as described by Hong et al. (2009). Measurements were taken after 8 days (*third panel*). Values are means  $\pm$  SD (n=15). Potassium deficient media were prepared as described by Jung et al. (2009). Measurements were taken after 8 days (*lower panel*). Values are means  $\pm$  SD (n=15).

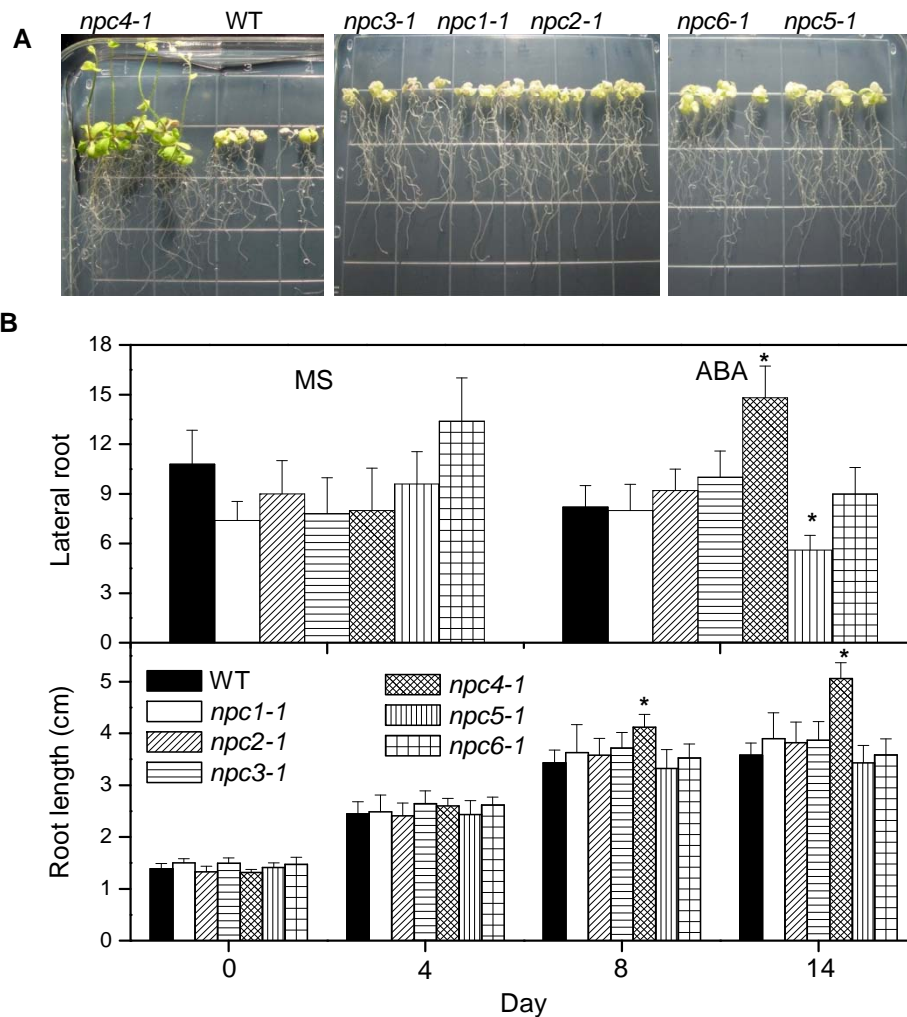

**Supplemental Figure 2. Phenotype of six NPC knockout mutants and WT seedlings in response to ABA.**

(A) Seedlings on  $\frac{1}{2}$  MS media containing ABA. Picture was taken two weeks after five-day old seedlings were transferred to medium containing 25  $\mu$ M ABA. (B) Lateral root number and root length on  $\frac{1}{2}$  MS media or media supplemented with 25  $\mu$ M ABA. *Upper Panel*, Lateral roots were scored after two weeks on media with or without ABA. Values are means  $\pm$  SD (n = 5). *Lower Panel*, primary root length was measured at indicated days after transfer. Day 0 refers to the day of transfer and before exposure to ABA. Values are means  $\pm$  SD (n = 15). Plants were grown under cool white fluorescent light of 100  $\sim$ mol  $m^{-2}s^{-1}$  under 16-h light/ 8-h dark and 23°C/22°C cycles for 2 weeks. \* Significant at P < 0.05 compared with the WT based on Student's *t* test.

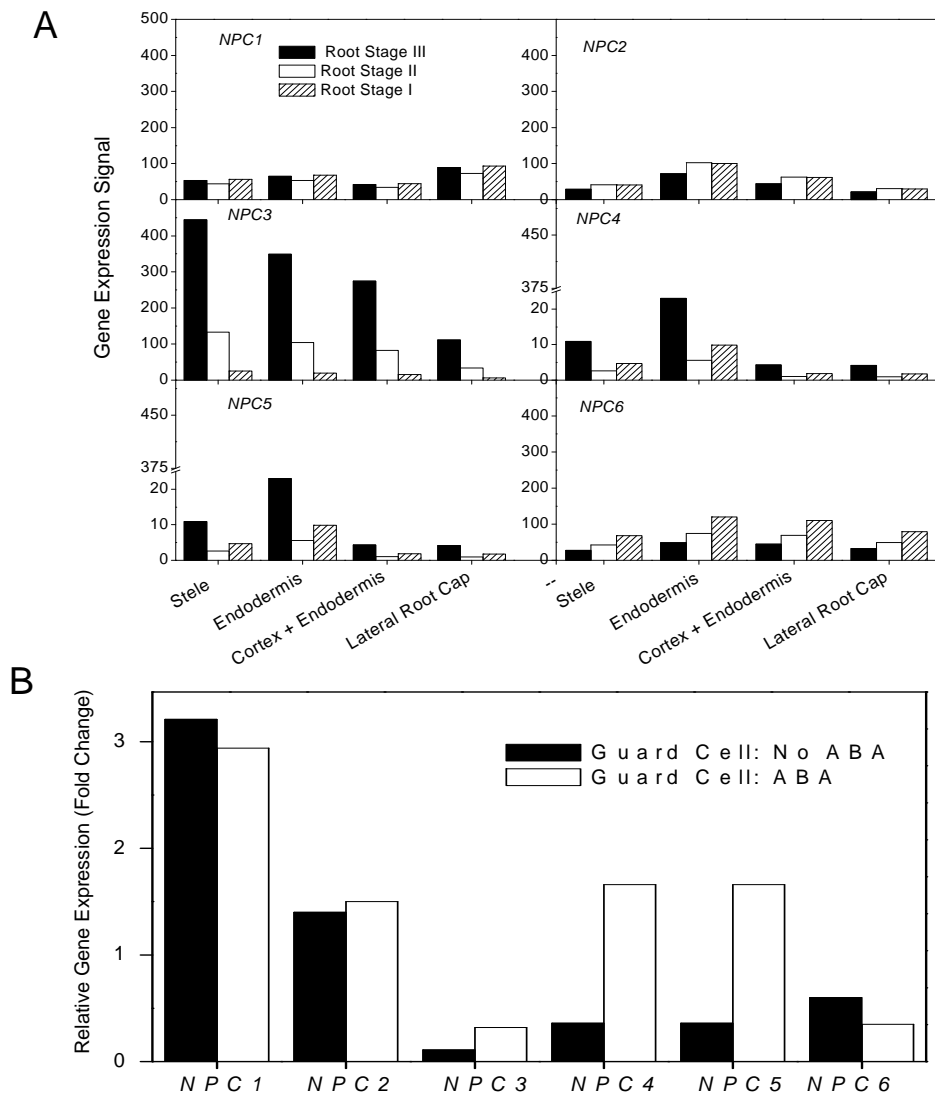

**Supplemental Figure 3. Expression of *NPCs* in root cells and guard cells in response to ABA.**

(A) Expression of the *NPCs* in root cells as reported by <http://bar.utoronto.ca>. Col-0 Arabidopsis plants were grown under 16-h light/ 8-h dark conditions on MS with 4.5% sucrose. Roots cells were isolated by protoplasting and fluorescence-activated cell sorting from 6-day old plants. RNA was hybridized to ATH1 GeneChips normalized by GCOS, (n=3). Results from Bimbaum et al. (2003) Science 302:1956; Nawy et al. (2005) Plant Cell 17: 1908. (B) RNA was hybridized to ATH1 GeneChip from guard cell protoplasts of 5-week old Arabidopsis Col-0 grown under 16-h light/8-h dark. The data were normalized by GCOS and measurements were taken in duplicates. Results from Yang et al. (2008) Plant Methods 4:6 as reported by <http://bar.utoronto.ca>. Note that the database data failed to distinguish *NPC4* and *NPC5* due to high sequence similarity. However, our data using gene specific primers showed that *NPC5* was mostly expressed in inflorescences, and its level of expression in leaves and roots was much lower than that of *NPC4* (refer to Figure 3). Thus, the combined *NPC4/5* transcript level in leaves and roots may result mostly from the *NPC4* expression.

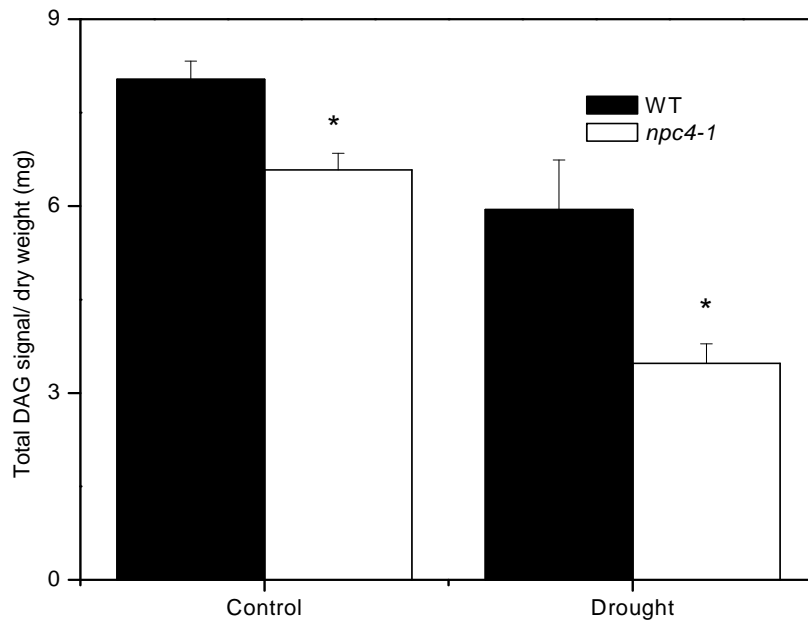

**Supplemental Figure 4. Drought effect on DAG content in WT and *npc4-1*.**

Water was withheld from four-week old soil grown Arabidopsis plants for 10 days; leaves were excised and total lipids were extracted as described by Welti et al. (2002). Briefly, excised tissue was immersed immediately in 3 ml hot isopropanol containing 0.01% butylated hydroxytoluene at 75°C. Samples were kept at 75°C for 15 min and 1.5 ml of chloroform and 0.6 ml of water were added. Samples were placed on a shaker for 1 h, and the solvent was transferred to a new tube. The samples were re-extracted using chloroform:methanol (2:1) at least 4 times for 30 min each time on a shaker. The lipid extracts were combined and washed with 1 M KCl followed by washing with 1 ml water. The solvent was evaporated under a stream of nitrogen gas and the remaining tissue was oven-dried at 100°C and weighed. DAG content was analyzed using ESI-MS/MS. \* Denotes that the difference between WT and mutant is significant with  $P < 0.05$  as determined by Student's *t* test. Values are means  $\pm$  SE (n = 5).

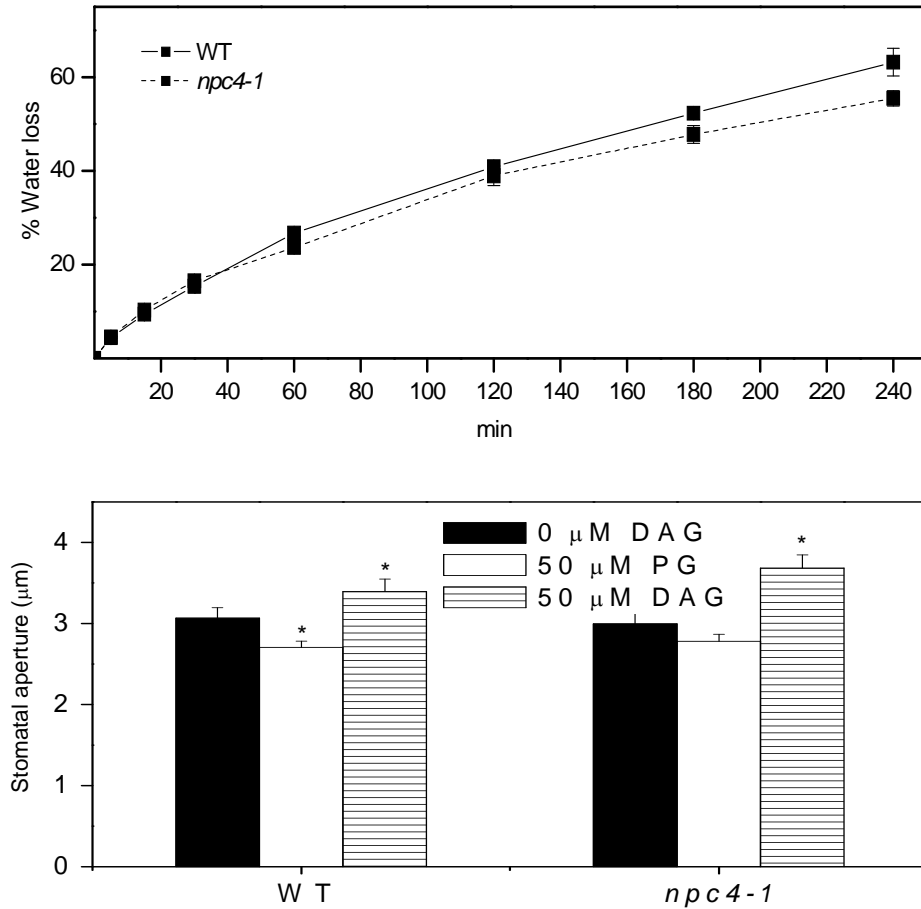

**Supplemental Figure 5. Water loss from detached leaves and DAG effect on stomatal opening**

(A) Fresh weight changes from detached leaves. Detached leaves of six-week-old plants were exposed to cool white light ( $125 \text{ mol m}^{-1}\text{s}^{-1}$ ) at  $23^\circ\text{C}$ . Leaves were weighed at various time intervals, and loss of fresh weight (%) was used to indicate water loss. Values are means  $\pm$  SD ( $n = 5$ ). Experiment was performed at least three times with similar results. (B) The effect of DAG and PG on stomatal opening in WT and *npc4-1*. Experiment was performed as described by Lee and Assmann (1991).

Briefly, epidermal peels of fully expanded leaves from 4-week old Arabidopsis plants were kept in darkness for 3 h to promote closure. Peels were then placed under cool white light ( $150 \text{ } \mu\text{mol m}^{-1}\text{s}^{-1}$ ) for 2 h and 8:0/8:0 DAG or 8:0/8:0 PG was added every 30 min. Stomatal aperture was visualized under a light microscope and measured using Image Pro software. \* Denotes that the difference between control and treatment is significant with  $P < 0.05$  as determined by Student's *t* test. Values are means  $\pm$  SE ( $n = 25-40$ ).

**Supplemental Table 1. Primers for identifying NPC-KO mutants and real-time PCR for genes in ABA response.**

|                                                | Gene        | Primer Sequence                                                                    |
|------------------------------------------------|-------------|------------------------------------------------------------------------------------|
| Primers for identifying NPC- KO mutants        | <i>NPC1</i> | Forward 5'-GTCTGCTCCTGCTTCCAGTGC-3'<br>Reverse 5'-TCTGGTTTTGAATCCCCCTTAGC-3'       |
|                                                | <i>NPC2</i> | Forward 5'-GCTTGCCTTGCTTTGCATGAT-3'<br>Reverse 5'- TCTCCGAGTTCGCTGTTTTTCG-3'       |
|                                                | <i>NPC3</i> | Forward 5'-CGTGGACAGTTGGACACATGC-3'<br>Reverse 5'- TTCGGGATCTAAACCGGGAAA-3'        |
|                                                | <i>NPC4</i> | Forward 5'-AGCTACCCAACACTACGTCGTGGTTCG-3'<br>Reverse 5'- GGTTGAGCAGCATTGATGCTTC-3' |
|                                                | <i>NPC5</i> | Forward 5'- TCACCTCCCCTTTCTCTTGCC-3'<br>Reverse 5'- TTGTGGTTGAACAACGTTGGTATG-3'    |
|                                                | <i>NPC6</i> | Forward 5'- GAATCCAAGGCGAAACCATAATGGT-3'<br>Reverse 5'- CAGTAAACCCGACAATAAACGGT-3' |
| Real time PCR primers for ABA responsive genes | <i>NPC1</i> | Forward 5'-ATATGTGCCCTCTGCATGTACCCA-3'<br>Reverse 5'-ATGGAGGCCATACCCGACAATCAT-3'   |
|                                                | <i>NPC2</i> | Forward 5'-AGAGCTTGTACAACACTAGCTGCGGT-3'<br>Reverse 5'-AGCCATACGACCAGCCTCTAAGAA-3' |
|                                                | <i>NPC3</i> | Forward 5'-CTGATTCAAGCAGCGGCTGTACTA-3'<br>Reverse 5'-AGCCTTCTTGGACTCACCATGGAA-3'   |
|                                                | <i>NPC4</i> | Forward 5'-AGCATCAAATGCTGCTGCTCAACC-3'<br>Reverse 5'-TCCACCCACACACAAGAGAAGTGA-3'   |

|              |                                                                                         |
|--------------|-----------------------------------------------------------------------------------------|
| <i>NPC5</i>  | Forward 5'-GGAGACTACAAAAACGAAGAATTGCTAT-3'<br>Reverse 5'-GTGATGGTGGTGGTTTCACAACATTAT-3' |
| <i>NPC6</i>  | Forward 5'-GCGGTTCTCAATGGTGATCACTTCCT-3'<br>Reverse 5'-GGCACCAAGCTTCATTGCCTCTTTAC-3'    |
| <i>ABI1</i>  | Forward 5'-TGTGGTGGTGGTTGATTTGAAGCC-3'<br>Reverse 5'-GCCTCAGTTCAAGGGTTTGCTCTT-3'        |
| <i>ABI2</i>  | Forward 5'-AAGTGTGCGATTTGGCTCGGAAAC-3'<br>Reverse 5'-TCCGGCCATCGCGTTCTTCTTAT-3'         |
| <i>RAB18</i> | Forward 5'-GCAGTCGCATTCGGTCGTTGTATT-3'<br>Reverse 5'-ACAACACACATCGCAGGACGTACA-3'        |
| <i>RD29B</i> | Forward 5'-ACAATCACTTGGCACCACCGTT-3'<br>Reverse 5'-AACTCACTTCCACCGGAATCCGAA-3'          |
| <i>RCN1</i>  | Forward 5'-GCGAAGCTGCAGCAAACAACCTAA-3'<br>Reverse 5'-CTGCATTGCCCATTCAGGACCAAAA-3'       |
| <i>OST1</i>  | Forward 5'-TGGAGGAAGACTTAGAGAGCGACCTT-3'<br>Reverse 5'-TGCGTACACAATCTCTCCGCTACT-3'      |
| <i>ERA1</i>  | Forward 5'-TGTGGCTCAGCACGCTTGGTTAAA-3'<br>Reverse 5'-ACCCATAATGTGCGGAGTCAAAGG-3'        |
| <i>UBQ10</i> | Forward 5'-CACACTCCACTTGGTCTTGCGT-3'<br>Reverse 5'-TGGTCTTTCCGGTGAGACTCTTCA-3'          |

*Supplemental References*

**Birnbaum, K., Shasha, D. E., Wang, J. Y., Jung, J. W., Lambert, G. M., Galbraith, D. W., and Benfey, P. N.** (2003). A gene expression map of the *Arabidopsis* root. *Science* **302**: 1956-1960.

**Hong, Y., Devaiah, S.P., Bahn, S.C., Thamasandra, B.N., Li, M., Welti, R., and Wang, X.** (2009). Phospholipase D $\epsilon$  and phosphatidic acid enhance *Arabidopsis* nitrogen signaling and growth. *Plant J.* **58**: 376-387.

**Jung, J.Y., Shin, R., and Schachtman, D.P.** (2009). Ethylene mediates response and tolerance to potassium deprivation in *Arabidopsis*. *Plant Cell* **21**: 607-621.

**Lee, Y., and Assmann, S.M.** (1991). Diacylglycerols induce both ion pumping in patch-clamped guard-cell protoplasts and opening of intact stomata. *Proc. Natl. Acad. Sci. USA* **88**: 2127-2131.

**Lopez-Bucio J, Hernandez-Abreu E, Sanchez-Calderon L, Nieto-Jacobo MF, Simpson J, Herrera-Estrella L.** (2002) Phosphate availability alters architecture and causes changes in hormone sensitivity in the *Arabidopsis* root system. *Plant Physiol.* 129, 244-256.

**Nawy, T., Lee J-Y., Colinas, J., Wang, J.Y., Thongrod, S.C., Malamy, J.E., Birnbaum, K., and Benfey, P.N.** (2005) Transcriptional profile of the *Arabidopsis* root quiescent center. *Plant Cell* **17**:1908

**Welti, R., Li, W., Li, M., Sang, Y., Biesiada, H., Zhou, H., Rajashekar, C.B., Williams, T.D., and Wang, X.** (2002). Profiling membrane lipids in plant stress responses: role of phospholipase D $\alpha$  in freezing- induced lipid changes in *Arabidopsis*. *J. Biol. Chem.* **277**: 31994-32002.

**Yang, Y., Costa, A., Leonhardt, N., Siegel, R.S., and Schroeder, J.I.** (2008). Isolation of a strong *Arabidopsis* guard cell promoter and its potential as a research tool. *Plant Methods* **4**: 6.
